# Supplementary material for: Bacterial Nanocellulose Fortified with Antimicrobial and Anti-Inflammatory Natural Products from Chelidonium majus Plant Cell Cultures
Source: MDPI journal article supplement (doi:10.3390/ma15010016), 2021-12-21
Supplement: s1 [file s1]

## Bacterial nanocellulose fortified with antimicrobial and anti-inflammatory natural products from *Chelidonium majus* plant cell cultures

Sylwia Zielińska<sup>1</sup>, Adam Matkowski<sup>2\*</sup>, Karolina Dydak<sup>3</sup>, Monika Ewa Czerwińska<sup>4,5</sup>, Magdalena Dziągwa-Becker<sup>6</sup>, Mariusz Kucharski<sup>6</sup>, Magdalena Wójciak<sup>7</sup>, Ireneusz Sowa<sup>7</sup>, Stanisława Plińska<sup>8</sup>, Karol Fijałkowski<sup>9</sup>, Daria Ciecholewska-Juśko<sup>9</sup>, Michał Broda<sup>9,10</sup>, Damian Gorczyca<sup>11</sup>, Adam Junka<sup>3</sup>

<sup>1</sup>Department of Pharmaceutical Biology and Biotechnology, Division of Pharmaceutical Biotechnology, Wrocław Medical University, 50-556 Wrocław, Poland

<sup>2</sup>Department of Pharmaceutical Biology and Biotechnology, Division of Pharmaceutical Biology and Botany, Wrocław Medical University, 50-556 Wrocław, Poland

<sup>3</sup>Pharmaceutical Microbiology and Parasitology, Wrocław Medical University, 50-556 Wrocław, Poland

<sup>4</sup>Department of Biochemistry and Pharmacogenomics, Faculty of Pharmacy, Medical University of Warsaw, 02-097 Warszawa, Poland

<sup>5</sup>Centre for Preclinical Research, Medical University of Warsaw, 1B Banacha street, 02-097 Warsaw, Poland

<sup>6</sup>Department of Weed Science and Tillage Systems, Institute of Soil Science and Plant Cultivation State Research Institute, 50-540 Wrocław, Poland

<sup>7</sup>Department of Analytical Chemistry, Medical University of Lublin, 20-093 Lublin, Poland

<sup>8</sup>Department of Inorganic Chemistry, Wrocław Medical University, 50-556 Wrocław, Poland

<sup>9</sup>Department of Microbiology and Biotechnology, Faculty of Biotechnology and Animal Husbandry, West Pomeranian University of Technology, 70-311 Szczecin, Poland

<sup>10</sup> Pomeranian-Masurian Potato Breeding Company, 76-024 Strzekęcino, Poland

<sup>11</sup> Faculty of Medicine, Lazarski University, 02-662 Warszawa, Poland

\*Correspondence: pharmaceutical.biology@wp.eu; Tel.: +48717840497

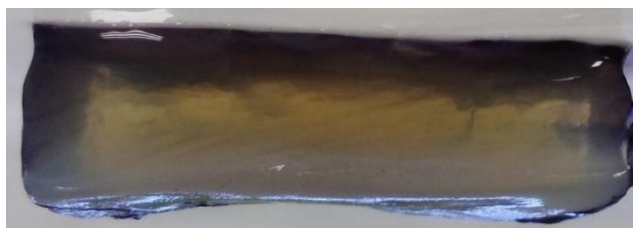

Bottom of BNC carrier

**Figure S1.** Vertical cross-section BNC containing *C. majus* cells. The blue areas show regions containing cells – mainly on the top of BNC carrier and on the side parts of BNC carrier. The middle and bottom parts are dye-free, suggesting lack of live *C. majus* cells in these areas.

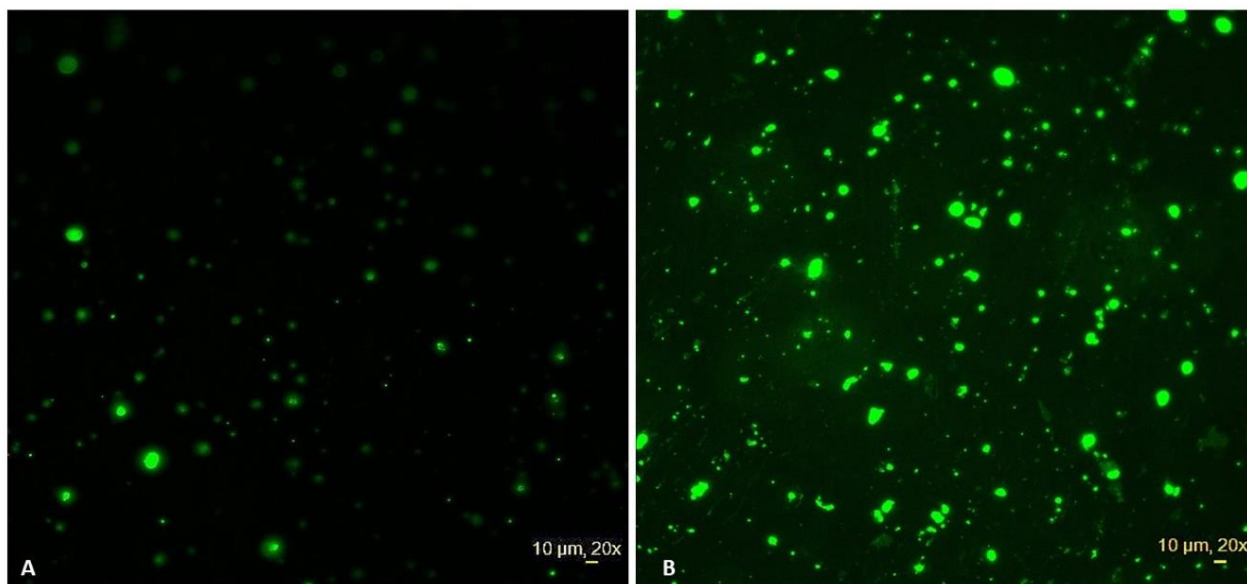

Figure S2. *C. majus* cells viability measured after two (A) and four (B) weeks of culture on liquid medium MH3. The yellow bar shows length of 10μm, magnification 20×, fluorescent microscope Lumascope 620.

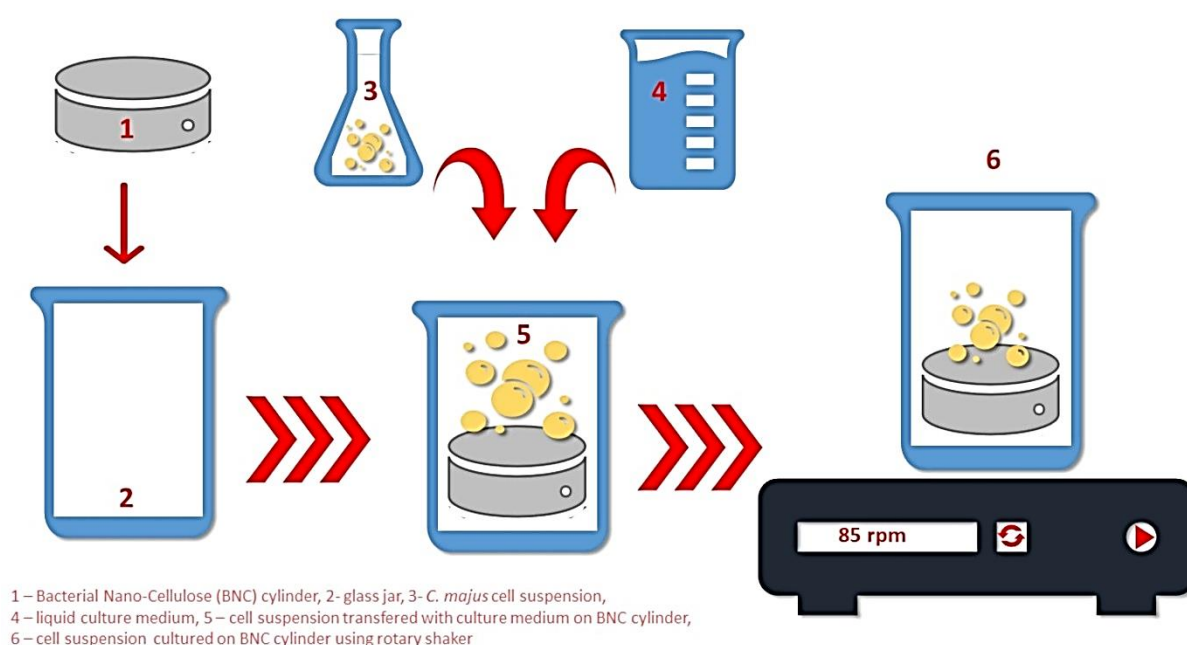

Figure S3. The schematic processes of the *C. majus* cells cultured on Bacterial Nano-Cellulose (BNC) matrix.

**Table S1. Minimal Inibitory Concentration and Minimal Biofilm Eradication Concentration of liquid obtained from BNC matrices**

| type of BNC              | Minimal Inibitory Concentration [% v/v] |                                      |                                      | Minimal Biofilm Eradication Concentration [% v/v] |                                      |                                      |
|--------------------------|-----------------------------------------|--------------------------------------|--------------------------------------|---------------------------------------------------|--------------------------------------|--------------------------------------|
|                          | <i>S. aureus</i>                        | <i>P. aeruginosa</i>                 | <i>C. albicans</i>                   | <i>S. aureus</i>                                  | <i>P. aeruginosa</i>                 | <i>C. albicans</i>                   |
| 3d BC- NC                | 25%                                     | 50%                                  | above tested range of concentrations | above tested range of concentrations              | above tested range of concentrations | above tested range of concentrations |
| 3d BC - H <sub>2</sub> O | above tested range of concentrations    | above tested range of concentrations | above tested range of concentrations | above tested range of concentrations              | above tested range of concentrations | above tested range of concentrations |
| 3d BC- NaOH              | above tested range of concentrations    | above tested range of concentrations | above tested range of concentrations | above tested range of concentrations              | above tested range of concentrations | above tested range of concentrations |

**Table S2. The impact of MH3 medium on tested microbes viability.** The viability is presented as [%] in comparison to standard microbiological Tryptic Soy Broth (for *S. aureus*, *P. aeruginosa*, *C. albicans*) or Herstin-Schramm (for *K.xylinus*) liquid medium within 1 day, 3 days and 7 days of incubation.

| species              | 1 day       | 3 days      | 7 days     |
|----------------------|-------------|-------------|------------|
| <i>S. aureus</i>     | 65.00±11.63 | 20.00±7.40  | 5.25±3.31  |
| <i>P. aeruginosa</i> | 61.75±11.33 | 36.25±6.44  | 10.50±6.76 |
| <i>C. albicans</i>   | 64.75±15.01 | 70.50±11.36 | 23.00±6.06 |
| <i>K. xylinus</i>    | 43.00±9.30  | 28.50±6.60  | 6.50±2.01  |

**Table S3. LC-MS/MS analysis of the content of the detected compounds and their retention times (Rt) in 3-, 5-, and 7-day-old cellulose (NaOH, H<sub>2</sub>O, NC) with *C. majus* cells cultured on MH3 medium for 14, 21, and 28 days.**

| Compound                    | Rt<br>[min] | NC [µg/ml ± SE] |                 |                  |                 |                 |                 |     |                 |                 | H <sub>2</sub> O [µg/ml ± SE] |                 |                 | NaOH [µg/ml ± SE] |     |                 |
|-----------------------------|-------------|-----------------|-----------------|------------------|-----------------|-----------------|-----------------|-----|-----------------|-----------------|-------------------------------|-----------------|-----------------|-------------------|-----|-----------------|
|                             |             | 3*              | 3**             | 3***             | 5*              | 5**             | 5***            | 7*  | 7**             | 7***            | 3*                            | 5*              | 7*              | 3*                | 5*  | 7*              |
| malic acid                  | 1.08        | p               | p               | p                | p               | p               | p               | p   | p               | p               | p                             | p               | nd              | p                 | p   | nd              |
| <i>trans</i> -aconitic acid | 1.15        | p               | nd              | nd               | p               | p               | p               | p   | p               | p               | p                             | p               | nd              | p                 | p   | nd              |
| quinic acid                 | 1.30        | nd              | p               | p                | p               | p               | p               | p   | p               | p               | p                             | nd              | nd              | p                 | nd  | nd              |
| protocatechuic acid         | 1.54        | nd              | p               | p                | nd              | p               | p               | p   | p               | p               | nd                            | nd              | nd              | nd                | nd  | nd              |
| chlorogenic acid            | 2.51        | nd              | 11.65<br>±0.52  | 12.166<br>±1.314 | 3.875<br>±0.325 | 3.77<br>±0.33   | 4.225<br>±0.369 | LOQ | LOQ             | LOQ             | 7.800<br>±0.400               | LOQ             | nd              | LOQ               | nd  | nd              |
| <i>trans</i> -caffeic acid  | 2.71        | nd              | 1.400<br>±0.144 | 1.550<br>±0.10   | 0.250<br>±0.000 | 0.220<br>±0.017 | LOQ             | LOQ | LOQ             | LOQ             | 0.411<br>±0.031               | LOQ             | nd              | LOQ               | nd  | nd              |
| salicylic acid              | 2.79        | nd              | 0.058<br>±0.008 | 0.075<br>±0.000  | 0.050<br>±0.000 | nd              | 0.110<br>±0.026 | LOQ | LOQ             | LOQ             | LOQ                           | nd              | nd              | nd                | nd  | nd              |
| tannic acid                 | 2.84        | nd              | 1.000<br>±0.100 | nd               | nd              | nd              | 2.833<br>±0.333 | LOQ | LOQ             | LOQ             | LOQ                           | nd              | nd              | nd                | nd  | nd              |
| a hydroxybenzoic acid       | 2.85        | nd              | 0.050<br>±0.000 | 0.075<br>±0.00   | 0.005<br>±0.000 | 0.075<br>±0.00  | 0.016<br>±0.001 | LOQ | LOQ             | LOQ             | LOQ                           | nd              | nd              | nd                | nd  | nd              |
| <i>p</i> -coumaric acid     | 3.97        | nd              | nd              | 0.150<br>±0.027  | nd              | nd              | LOQ             | LOQ | LOQ             | LOQ             | LOQ                           | nd              | nd              | nd                | nd  | nd              |
| vanillin                    | 5.15        | nd              | nd              | 0.350<br>±0.028  | nd              | nd              | LOQ             | LOQ | LOQ             | LOQ             | LOQ                           | nd              | nd              | nd                | nd  | nd              |
| protopine derivative        | 6.75        | p               | p               | p                | p               | p               | p               | p   | p               | p               | p                             | p               | nd              | p                 | p   | nd              |
| coptisine                   | 7.50        | LOD             | nd              | nd               | nd              | nd              | nd              | nd  | nd              | nd              | LOQ                           | 0.239<br>±0.001 | LOQ             | LOQ               | LOQ | LOQ             |
| quercetin                   | 8.34        | LOD             | 1.050<br>±0.020 | 0.966<br>±0.016  | 0.500<br>±0.086 | 0.450<br>±0.028 | 0.490<br>±0.036 | LOQ | LOQ             | LOQ             | LOQ                           | 0.090<br>±0.00  | nd              | nd                | nd  | nd              |
| chelidonine                 | 9.56        | LOD             | LOQ             | LOQ              | LOQ             | LOQ             | LOQ             | nd  | nd              | nd              | LOD                           | nd              | 0.064<br>±0.088 | nd                | nd  | 0.081<br>±0.004 |
| chelerythrine               | 10.44       | nd              | nd              | nd               | nd              | nd              | LOD             | nd  | nd              | 0.062<br>±0.034 | 0.125<br>±0.029               | 0.074<br>±0.001 | nd              | nd                | nd  | nd              |
| sanguinarine                | 11.80       | LOQ             | 0.050<br>±0.000 | LOD              | 0.050<br>±0.000 | 0.030<br>±0.008 | 0.011<br>±0.001 | nd  | 0.034<br>±0.020 | 0.152<br>±0.014 | 0.022<br>±0.002               | 0.100<br>±0.007 | 0.576<br>±0.060 | nd                | nd  | 0.643<br>±0.075 |
| protopine                   | 12.76       | 6.250<br>±0.750 | 8.500<br>±0.764 | 5.833<br>±0.601  | 4.750<br>±0.433 | 3.750<br>±0.144 | 5.940<br>±0.314 | LOD | LOQ             | LOQ             | 7.566<br>±0.929               | LOQ             | 0.197<br>±0.019 | LOQ               | LOQ | 0.395<br>±0.012 |

p – present, where identification was based on mass spectra with no reference substances; nd – not detected; \* after 14 days, \*\* after 21 days and \*\*\* after 28 days

**Table S4. Isoquinoline alkaloids content [ $\mu\text{g/ml} \pm \text{SD}$ ] in the extracts of *C. majus* callus cultured for 4 weeks on solid medium MH3 supplemented or not with plant growth regulators (PGRs: 2,4-Dichlorophenoxyacetic acid [ $2.5 \mu\text{M}$ ] 1-Naphthaleneacetic acid [ $0.5 \mu\text{M}$ ] Kinetin [ $1.0 \mu\text{M}$ ])\* and in liquid MH3 medium supplemented or not with the same composition of PGRs after the 4 week of *C. majus* cell suspension culture\*\*.**

| compound      | Callus MH3*         | Callus MH3+PGRs*    | Cell-free culture medium MH3** | Cell-free culture medium MH3+PGRs** |
|---------------|---------------------|---------------------|--------------------------------|-------------------------------------|
| Protopine     | 0.2950 $\pm$ 0.0126 | 0.5886 $\pm$ 0.0103 | 0.3005 $\pm$ 0.0058            | 0.2934 $\pm$ 0.0155                 |
| Chelidonine   | 0.0567 $\pm$ 0.0042 | 0.1802 $\pm$ 0.0032 | 0.0441 $\pm$ 0.0082            | 0.0595 $\pm$ 0.0042                 |
| Coptisine     | LOQ                 | 0.1667 $\pm$ 0.0058 | LOQ                            | 0.1471 $\pm$ 0.0172                 |
| Sanguinarine  | 0.1617 $\pm$ 0.0051 | 0.6670 $\pm$ 0.0652 | 0.2628 $\pm$ 0.0214            | 0.5389 $\pm$ 0.0490                 |
| Chelerythrine | nd                  | 0.1370 $\pm$ 0.0030 | nd                             | nd                                  |

\**C. majus* callus extracts were prepared and analyzed according to the previously reported method by Zielińska et al. 2018a [8]; \*\*culture media after *C. majus* cells separation using filter paper.

**Table S5. Antimicrobial activity of free *C.majus* metabolites-enriched MH3 medium**

| microbes                                        | Minimal Microbiocidal Concentration [%v/v] |                      |                    | Minimal Biofilm Eradication Concentration [% v/v] |                                     |                                     |
|-------------------------------------------------|--------------------------------------------|----------------------|--------------------|---------------------------------------------------|-------------------------------------|-------------------------------------|
|                                                 | <i>S. aureus</i>                           | <i>P. aeruginosa</i> | <i>C. albicans</i> | <i>S. aureus</i>                                  | <i>P. aeruginosa</i>                | <i>C. albicans</i>                  |
| free <i>C.majus</i> metabolites-enriched medium | 50%                                        | 25%                  | 50%                | above tested range of concentration               | above tested range of concentration | above tested range of concentration |
